# Supplementary material
Source: PubMed Central journal article supplement (PMC2682858)
Supplement: M808173200_1.pdf [file M808173200_1.pdf]

Supplemental Table 1: Bacterial strains and plasmids used in this study

|                                               | Description                                                                | Reference                  |
|-----------------------------------------------|----------------------------------------------------------------------------|----------------------------|
| <i>Synechocystis</i> strains                  |                                                                            |                            |
| PCC6803                                       |                                                                            | Pasteur Culture Collection |
| PCC6803 $\Delta$ DTD3                         | PCC6803 $\Delta$ <i>dtd3</i>                                               | This work                  |
| <i>E. coli</i> strain                         |                                                                            |                            |
| K37 $\Delta$ RecA $\Delta$ TyrH $\lambda$ DE3 | K37 $\Delta$ <i>recA938::cat</i> $\Delta$ <i>dtd::kan</i> ( $\lambda$ DE3) | (15)                       |
| Plasmids                                      |                                                                            |                            |
| pET3alpa                                      | Ap <sup>R</sup>                                                            | (20)                       |
| pET15blpa                                     | Ap <sup>R</sup>                                                            | (20)                       |
| pET3alpa::0208                                | Ap <sup>R</sup> <i>sll0208</i> derivative of pET3alpa                      | This work                  |
| pET3alpa::1786                                | Ap <sup>R</sup> <i>sll1786</i> derivative of pET3alpa                      | This work                  |
| pET15blpa::1786                               | Ap <sup>R</sup> <i>sll1786</i> derivative of pET15blpa                     | This work                  |
