# Supplementary material
Source: PubMed Central journal article supplement (PMC2682858)
Supplement: M808173200_2.pdf [file M808173200_2.pdf]

Supplemental Table 2: Oligonucleotides used in this study

---

| Oligonucleotide  | Sequence                                                   |
|------------------|------------------------------------------------------------|
| sll1786_NdeI_for | GGGAATTCCATATGCATTTAGTTGATACCCATGTCC                       |
| sll1786_NotI_rev | TTTTCCTTTTGC GGCCGCTTAGGCAGGCACCGGTAGTTTAAAAAG             |
| sll1786_XbaI_for | CTAGTCTAGACTAGTTTAAGGAGATATACATATGCATTTAGTTGAT<br>ACCCATGT |
| sll0208_NdeI_for | GGGAATTCCATATGCCCCGAGCTTGCTGTCCGC                          |
| sll0208_NotI_rev | TTTTCCTTTTGC GGCCGCTTAGACTCCGGCCAAACCGTAG                  |
| Av_SacII         | TCCCCGCGGTCTGGGGGTATCGCCCC                                 |
| Av-NotI          | TTTTCCTTTTGC GGCCGCATAACTGTTGACCACCACTAA                   |
| Am_NdeI          | GGGAATTCCATATGCCTTCTGGCCAGCCAGTG                           |
| Am_KpnI          | GGGGTACCGGTTCCCCTAATGCCGTG                                 |
| Kan_KpnI         | CATTAGGGAACCGGTACCCCCACGTTGTGTCTCAAAATCTCTG                |
| Kan_SacII        | ACCCCCAGACCGCGGGGATTAGAAAACTCATCGAGCATCAAATG               |
| kan-2            | CTCGAGCAAGACGTTTCCC                                        |
| 30s_6            | CAATTCTGATCTTTATGAACCC                                     |
| 1786_1           | ACTGGTATTCTAGCTGGGG                                        |
| 1786_5           | GCCGGGGAGAGGTTACC                                          |

---
